# Supplementary material for: Acute Effects of Sceletium tortuosum (Zembrin), a Dual 5-HT Reuptake and PDE4 Inhibitor, in the Human Amygdala and its Connection to the Hypothalamus
Source: PubMed Central journal article supplement — Neuropsychopharmacology. 2013 Aug 21;38(13):2708–16. doi: 10.1038/npp.2013.183 (PMC3828542; doi:10.1038/npp.2013.183), 2013-08-21
Supplement: npp2013183x1.pdf [file npp2013183x1.pdf]

## Supplementary information

# Acute effects of *Sceletium tortuosum* (Zembrin<sup>®</sup>), a dual 5-HT reuptake and PDE4 inhibitor, in the human amygdala and its connection to the hypothalamus

David Terburg<sup>1,2\*</sup>, Supriya Syal<sup>2,3\*</sup>, Lisa A. Rosenberger<sup>1</sup>, Sarah Heany<sup>2</sup>, Nicole Phillips<sup>2</sup>, Nigel Gericke<sup>4</sup>, Dan J. Stein<sup>2</sup> & Jack van Honk<sup>1,2</sup>

<sup>1</sup>Department of Psychology, Utrecht University, the Netherlands

<sup>2</sup>Department of Psychiatry & Mental Health, University of Cape Town, South Africa

<sup>3</sup>Department of Psychology, University of Toronto, Canada

<sup>4</sup>HG&H Pharmaceuticals (Pty) Ltd, South Africa

Corresponding author:

David Terburg

Department of Psychology, Utrecht University, the Netherlands

Heidelberglaan 2, 3584 CS Utrecht

The Netherlands

Phone: +31 30 253 3043

Fax: +31 30 253 4511

Email: [d.terburg@uu.nl](mailto:d.terburg@uu.nl)

This study was made possible by funds from H.L. Hall and Sons, Ltd, South Africa, and Netherlands Organization of Scientific Research (Brain and Cognition Grant 056-24-010).

**Investigational product**

Extract *Sceletium tortuosum* (Zembrin<sup>®</sup>) was manufactured by the company PoliNat, Las Palmas, Spain, according to European Union Good Manufacturing Practice (GMP). The extract, lot number SCE0411-1605, was in the form of a fine dry powder with the dry plant material: extract ratio of 2:1, standardized to a total alkaloid content of not less than 0.38% by dry weight for the total of the four alkaloids: mesembrenone, mesembrenol, mesembranol and mesembrine. Harvey and colleagues (2011) characterized the alkaloid composition by the relative amounts of three key alkaloids, whereby mesembrenone + mesembrenol > 70% of the total weight of the four alkaloids, mesembrine < 20%, and the minor compound mesembranol is present. In order to establish the most likely active components of Zembrin<sup>®</sup>, the activities of the isolated three main alkaloids present in the extract (mesembrenol, mesembrenone and mesembrine) were further studied on the 5-HT transporter, and on PDE4. All three were potently active in the 5-HT transporter binding assay (K<sub>i</sub>'s 1–60 nM) and against PDE4B activity (IC<sub>50</sub>'s 0.5–16 μM). Of the three alkaloids mesembrenone is the pure compound closest to being a dual-acting 5-HT uptake and PDE4 inhibitor as the difference between concentrations for 50% effect on the two assays was 17 times, whereas it was 258 times for mesembrenol and 5500 for Mesembrine. Mesembrine was the compound showing most selectivity for the 5-HT transporter over PDE4B. Furthermore, the plant extract Zembrin<sup>®</sup> was shown *in-vitro* to have an IC<sub>50</sub> of 4.3 μg/ml in the 5-HT transporter binding assay and an IC<sub>50</sub> of 8.5 μg/ml on phosphodiesterase 4 (Harvey *et al*, 2011). The extract can thus be considered to be almost twice as potent on 5-HT reuptake than on PDE4.

No pharmacokinetic studies have yet been done on the extract, but *in-vitro* mucosal permeation studies (Shikanga *et al*, 2012) indicated that the main alkaloids found in Zembrin<sup>®</sup>; mesembrine, mesembrenone, mesembrenol and mesembranol, both as isolated pure compounds and in extract form, do cross intestinal mucosal surfaces. The permeability of mesembrine across intestinal mucosa was shown to be more rapid than that of caffeine used as a reference compound. Moreover, during ethnobotanical field work in Namaqualand in 1995 local pastoralists who chew *Sceletium* informed one of the authors (NG) that the calming effect of *Sceletium* could be felt within some twenty minutes of chewing the plant and swallowing the resulting saliva mixed with plant sap.

Thus, reports by indigenous people of rapid onset of activity, and supporting in-vitro permeation studies suggested that effects of the investigational product should be apparent after two hours after ingestion.

**Table S1.** Participants' gender, age, race, guess on administration order, and subjective side-effects for each session.

| <b>Gender</b> | <b>Age</b> | <b>Race</b> | <b>Gussed correct?</b> | <b>Zembrin</b>                          | <b>Placebo</b>                         |
|---------------|------------|-------------|------------------------|-----------------------------------------|----------------------------------------|
| Female        | 18         | White       | Yes                    | Nauseus and calm                        | -                                      |
| Female        | 18         | Coloured    | No                     | -                                       | Tasks felt easier                      |
| Female        | 19         | Black       | Yes                    | A bit woozy                             | -                                      |
| Female        | 18         | Coloured    | No                     | Drowsy and calm                         | -                                      |
| Female*       | 18         | Black       | Yes                    | Tired and as if she had taken something | -                                      |
| Female        | 18         | Indian      | Yes                    | More alert and relaxed                  | -                                      |
| Female        | 18         | White       | Yes                    | A bit sleepy                            | -                                      |
| Female        | 19         | Coloured    | Yes                    | -                                       | -                                      |
| Male          | 20         | White       | Yes                    | More alert                              | Less alert                             |
| Male          | 19         | White       | No                     | More calm and different                 | Anxious                                |
| Male          | 21         | White       | Yes                    | Relaxed                                 | Tired and slow                         |
| Male          | 19         | Coloured    | Yes                    | Calm and confident                      | Anxious                                |
| Male          | 21         | Black       | No                     | -                                       | More relaxed                           |
| Male          | 19         | White       | Yes                    | Clearer thinking and relaxed            | Less focused                           |
| Male          | 21         | Black       | No                     | -                                       | Better concentration, more comfortable |
| Male          | 21         | White       | No                     | More tired                              | More awake, mentally sharp             |

\* Participant excluded from analyses based on task performance, which was more than 3SD below average

**References**

Harvey AL, Young LC, Viljoen AM, Gericke NP (2011). Pharmacological actions of the South African medicinal and functional food plant *Sceletium tortuosum* and its principal alkaloids. *J Ethnopharmacol* **137**(3): 1124-1129.

Shikanga EA, Hamman JH, Chen W, Combrinck S, Gericke N, Viljoen AM (2012). In vitro permeation of mesembrine alkaloids from *Sceletium tortuosum* across porcine buccal, sublingual, and intestinal mucosa. *Planta Med* **78**(3): 260-268.
